# Supplementary material
Source: PubMed Central journal article supplement (PMC4790783)
Supplement: aylp008875.ww1_default.pdf [file aylp008875.ww1_default.pdf]

Appendix: Crude 2 day mortality rates (per 1,000 admissions) and adjusted odds ratios by day of procedure, England 2008/9-2010/11 [posted as supplied by author]

|                                                    | Day of procedure |                  |                  |                  |                  |                   | p value<br>† |
|----------------------------------------------------|------------------|------------------|------------------|------------------|------------------|-------------------|--------------|
|                                                    | Mon              | Tues             | Wed              | Thu              | Fri              | W/e               |              |
| <i>All elective surgical procedures</i>            |                  |                  |                  |                  |                  |                   |              |
| No of admissions                                   | 759,969          | 852,438          | 836,623          | 828,252          | 669,184          | 186,880           |              |
| No of deaths (mortality rate per 1,000 admissions) | 495 (0.7)        | 610 (0.7)        | 713 (0.9)        | 723 (0.9)        | 635 (0.9)        | 277 (1.5)         | <0.001       |
| Odds Ratio (95% CI)                                | 1                | 1.08 (0.96-1.21) | 1.27 (1.13-1.43) | 1.31 (1.17-1.47) | 1.42 (1.26-1.60) | 2.67 (2.30-3.09)  | <0.001       |
| <i>Higher risk procedures</i>                      |                  |                  |                  |                  |                  |                   |              |
| Excision of oesophagus and/or stomach              |                  |                  |                  |                  |                  |                   |              |
| No of admissions                                   | 1201             | 1128             | 941              | 1098             | 490              | 223               |              |
| No of deaths (mortality rate per 1,000 admissions) | 5 (4.2)          | 6 (5.3)          | 3 (3.2)          | 10 (9.1)         | 4 (8.2)          | 5 (22.4)          | 0.008        |
| Odds Ratio (95% CI)                                | 1                | 1.27 (0.39-4.18) | 0.76 (0.18-3.21) | 2.23 (0.76-6.57) | 2.01 (0.53-7.54) | 5.98 (1.69-21.24) | 0.008        |
| Excision of colon and/ or rectum                   |                  |                  |                  |                  |                  |                   |              |
| No of admissions                                   | 14541            | 19061            | 18125            | 16399            | 11937            | 2251              |              |
| No of deaths (mortality rate per 1,000 admissions) | 38 (2.6)         | 55 (2.9)         | 71 (3.9)         | 75 (4.6)         | 58 (4.9)         | 36 (16.0)         | <0.001       |
| Odds Ratio (95% CI)                                | 1                | 1.1 (0.73-1.66)  | 1.49 (1.01-2.21) | 1.74 (1.18-2.57) | 1.84 (1.22-2.77) | 6.21 (3.92-9.83)  | <0.001       |
| Coronary artery bypass graft                       |                  |                  |                  |                  |                  |                   |              |
| No of admissions                                   | 8891             | 9071             | 8776             | 8347             | 6544             | 1601              |              |
| No of deaths (mortality rate per 1,000 admissions) | 35 (3.9)         | 37 (4.1)         | 45 (5.1)         | 46 (5.5)         | 46 (7.0)         | 10 (6.2)          | 0.003        |
| Odds Ratio (95% CI)                                | 1                | 1.03 (0.65-1.63) | 1.33 (0.85-2.07) | 1.38 (0.89-2.14) | 1.75 (1.13-2.73) | 1.79 (0.88-3.63)  | 0.003        |
| Repair of abdominal aortic aneurysm                |                  |                  |                  |                  |                  |                   |              |
| No of admissions                                   | 2392             | 2499             | 2734             | 2448             | 1379             | 202               |              |
| No of deaths (mortality rate per 1,000 admissions) | 21 (8.8)         | 27 (10.8)        | 29 (10.6)        | 29 (11.8)        | 21 (15.2)        | 8 (39.6)          | 0.006        |
| Odds Ratio (95% CI)                                | 1                | 1.26 (0.71-2.25) | 1.25 (0.71-2.20) | 1.40 (0.79-2.46) | 1.73 (0.94-3.18) | 4.30 (1.86-9.90)  | 0.008        |
| Excision of lung                                   |                  |                  |                  |                  |                  |                   |              |
| No of admissions                                   | 3194             | 3356             | 3414             | 3397             | 2209             | 357               |              |
| No of deaths (mortality rate per 1,000 admissions) | 4 (1.3)          | 7 (2.1)          | 8 (2.3)          | 10 (2.9)         | 8 (3.6)          | 1 (2.8)           | 0.064        |
| Odds Ratio (95% CI)                                | 1                | 1.68 (0.49-5.74) | 1.85 (0.56-6.16) | 2.41 (0.75-7.69) | 2.90 (0.87-9.66) | 2.19 (0.24-19.67) | 0.065        |
| <i>Lower risk procedures(combined)*</i>            |                  |                  |                  |                  |                  |                   |              |
| No of admissions                                   | 99480            | 108038           | 105789           | 109529           | 95349            | 37450             |              |
| No of deaths (mortality rate per 1,000 admissions) | 34 (0.3)         | 36 (0.3)         | 44 (0.4)         | 46 (0.4)         | 40 (0.4)         | 19 (0.5)          | 0.100        |
| Odds Ratio (95% CI)                                | 1                | 0.97 (0.61-1.55) | 1.21 (0.77-1.89) | 1.23 (0.79-1.91) | 1.23 (0.78-1.94) | 1.54 (0.88-2.70)  | 0.085        |

Odds Ratios adjusted for age, sex, socio-economic deprivation, co-morbidities, ethnic group, year of procedure, emergency admissions in the last 12 months and day of the week; CI, confidence interval; \* hip replacement, knee replacement, inguinal hernia, varicose vein stripping or ligation, tonsillectomy, primary repair of femoral hernia, and repair of other hernia abdominal wall; † p value for linear trend.
